# Supplementary material for: HMGB1 couples LEF1 to regulate B cell immunity
Source: JCI journal article supplement (doi:10.1172/jci.insight.187002), 2025-09-22

Fig2- F&L

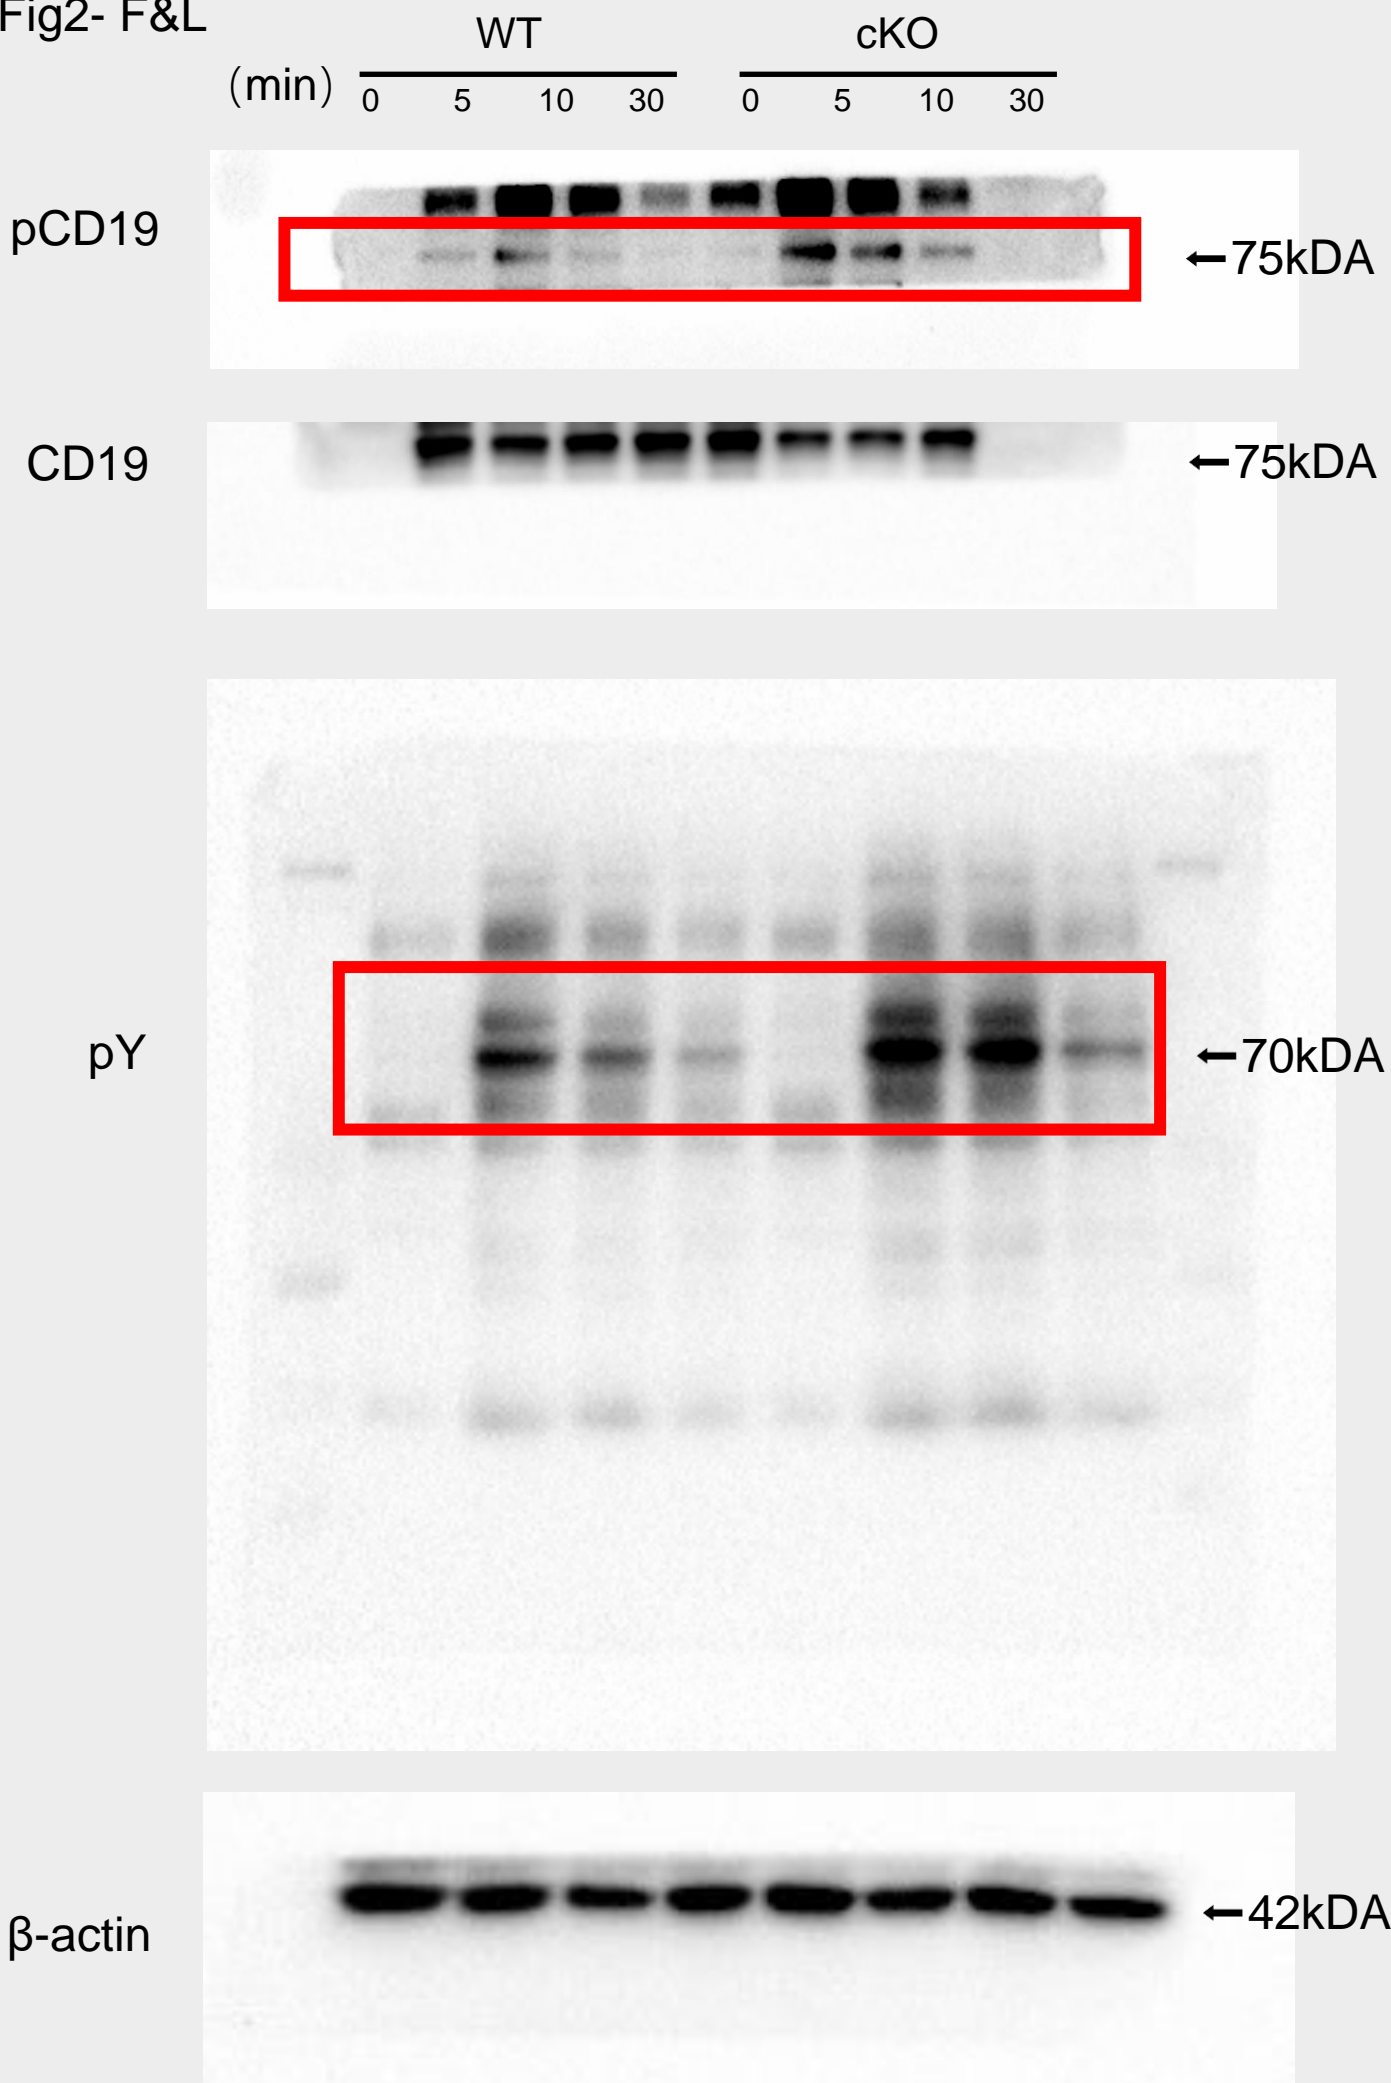

Fig2-L

(min) WT cKO  
0 5 10 30 0 5 10 30

pBtk

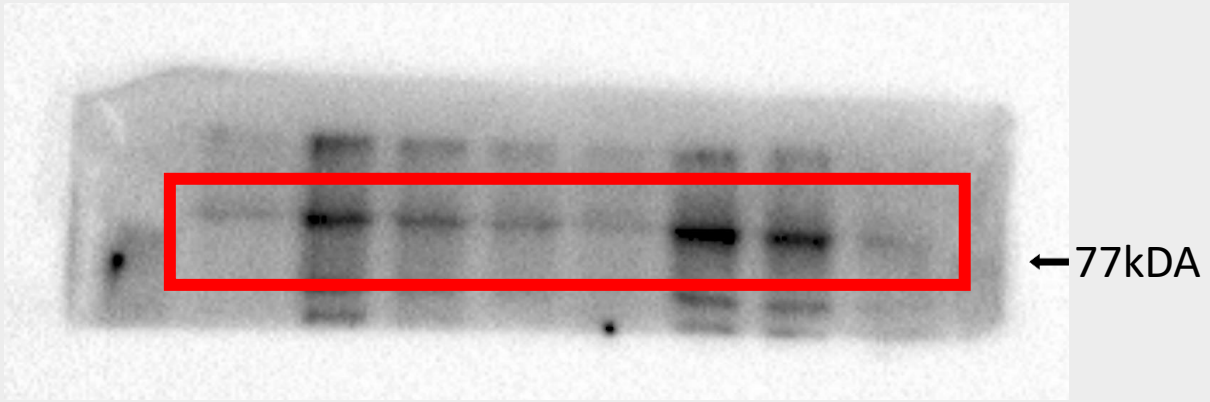

BTK

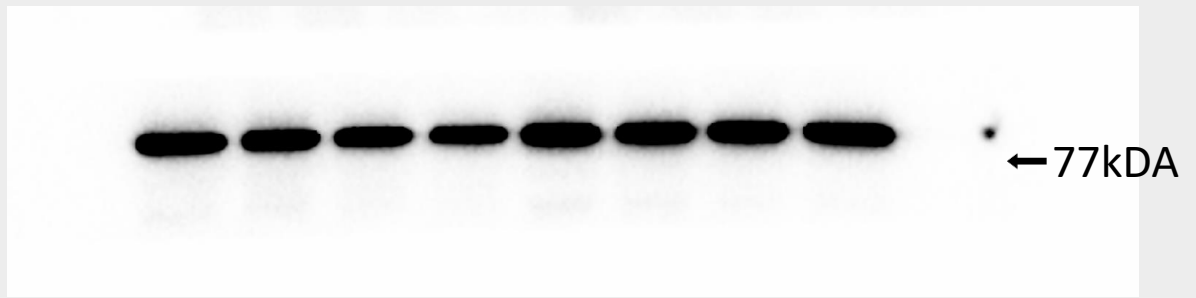

pSHIP1

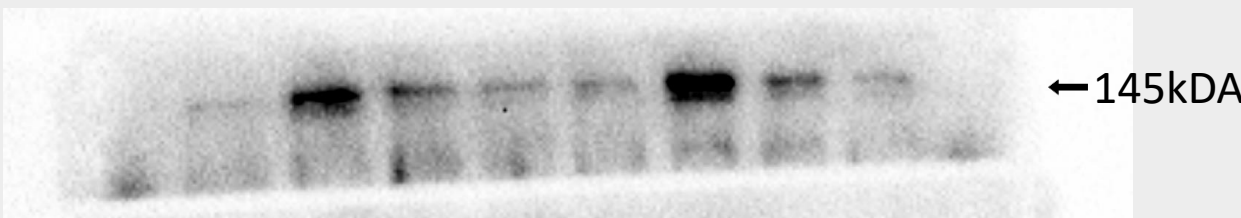

SHIP1

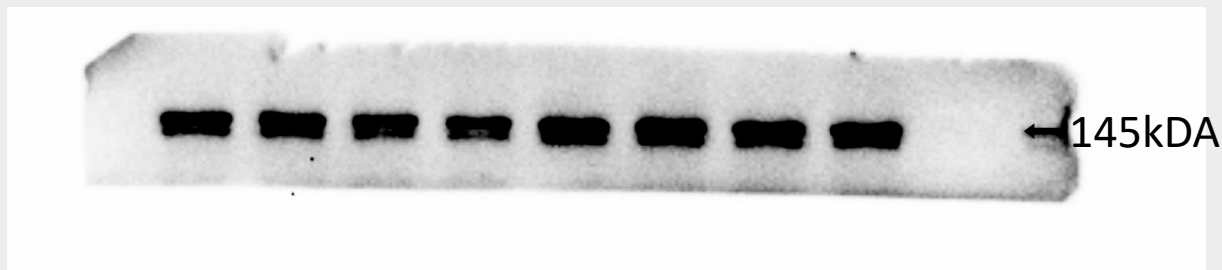

Fig3A

(min) WT cKO  
0 5 10 30 0 5 10 30

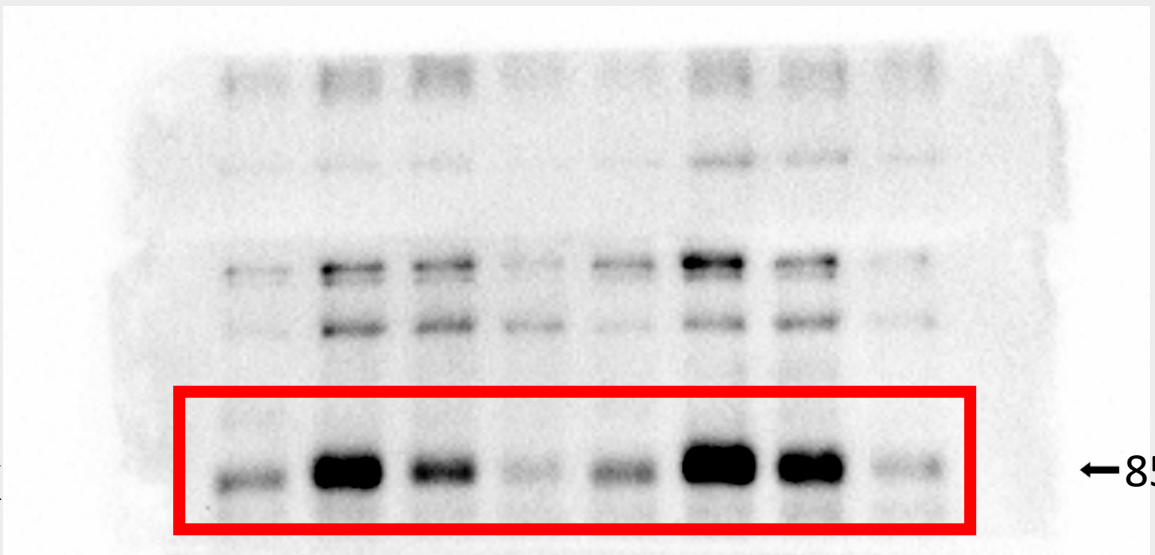

pPI3K

←85kDA

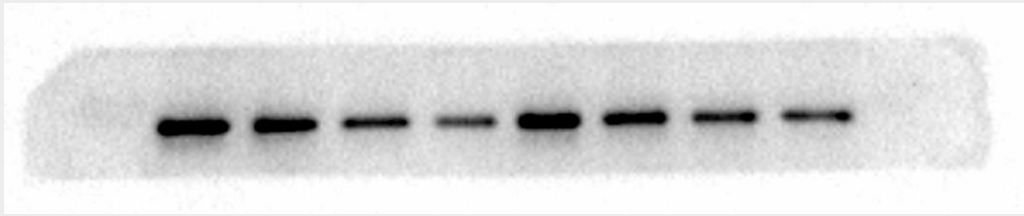

PI3K

←85kDA

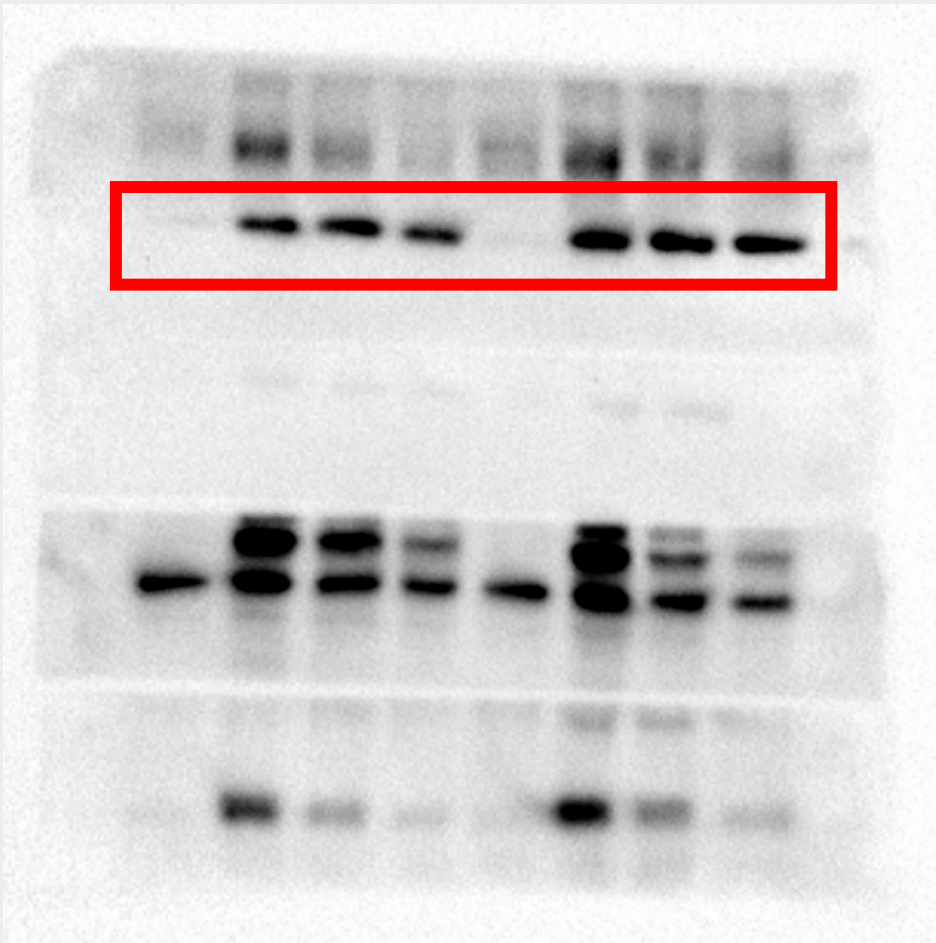

pAKT

←60kDA

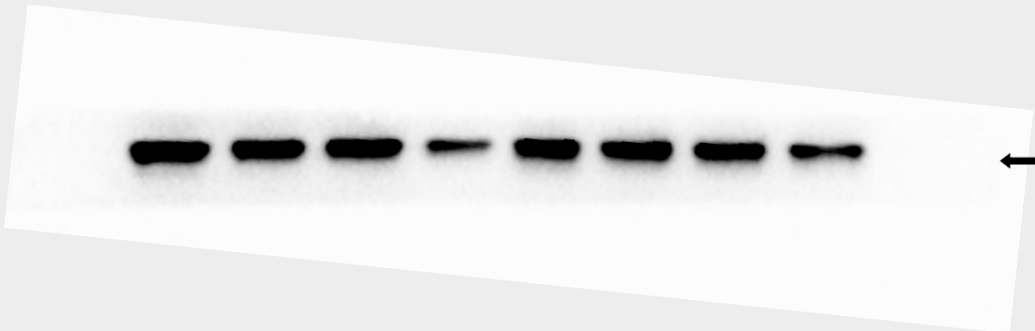

AKT

←60kDA

Fig3A

(min) WT cKO  
0 5 10 30 0 5 10 30

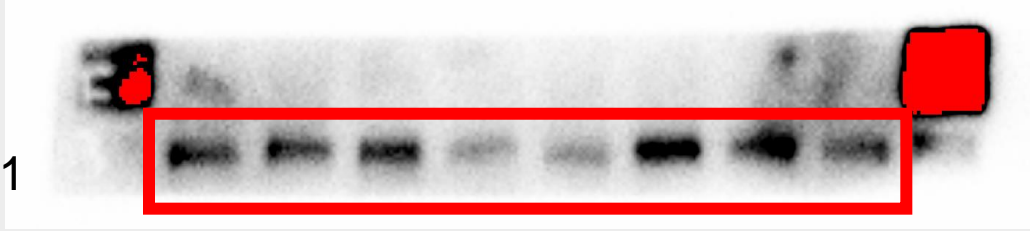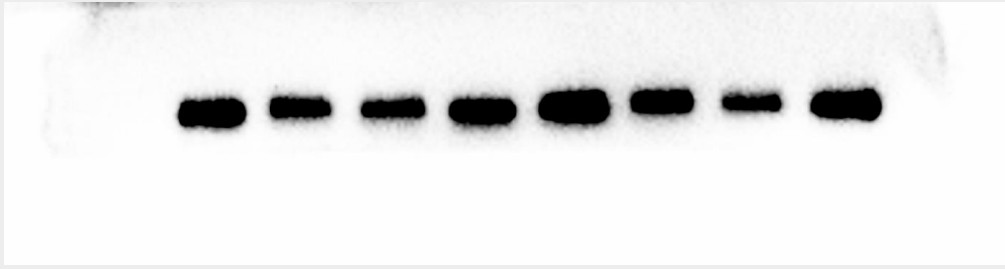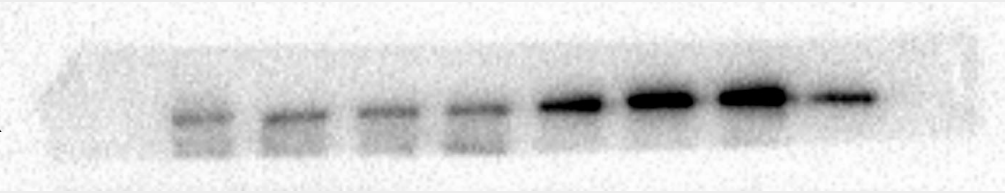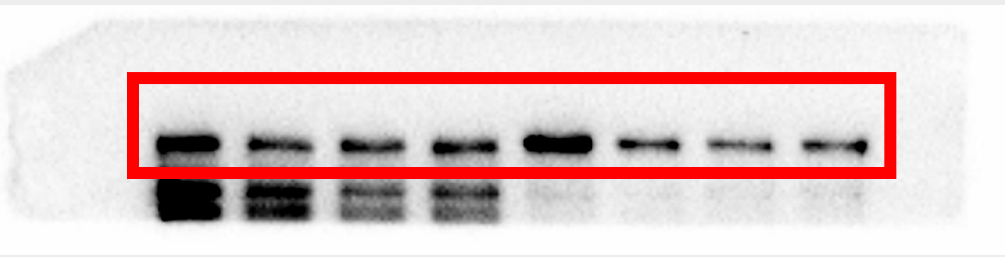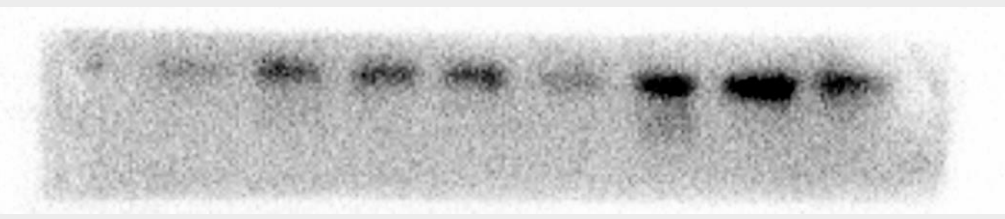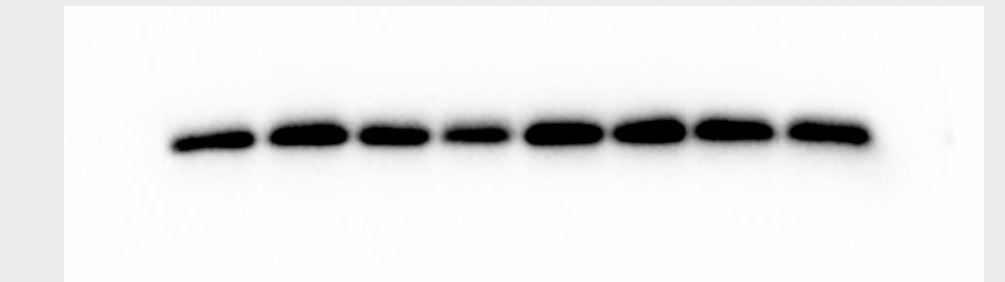

pFOXO1

←82kDA

FOXO1

←82kDA

pmTOR

←289kDA

mTOR

←289kDA

pS6

←32kDA

S6

←32kDA

Fig3B

(min)      WT                      cKO                      cKO+Rapamycin

0   5   10   30      0   5   10   30      0   5   10   30

pPI3K

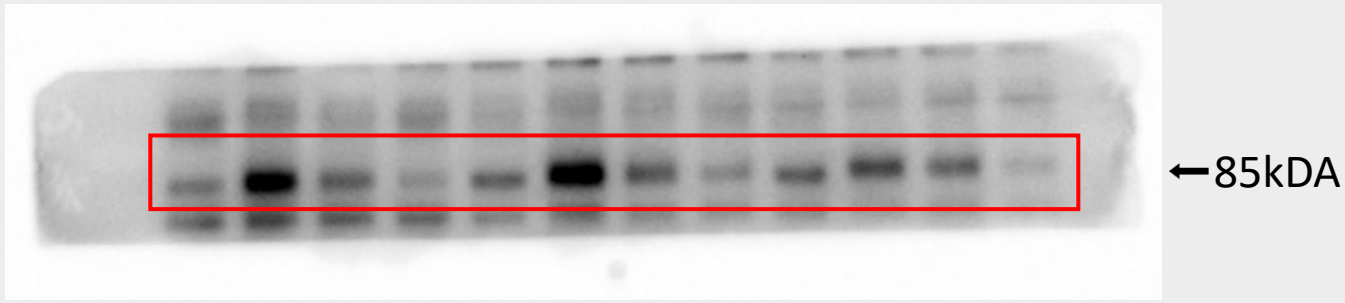

pBTK

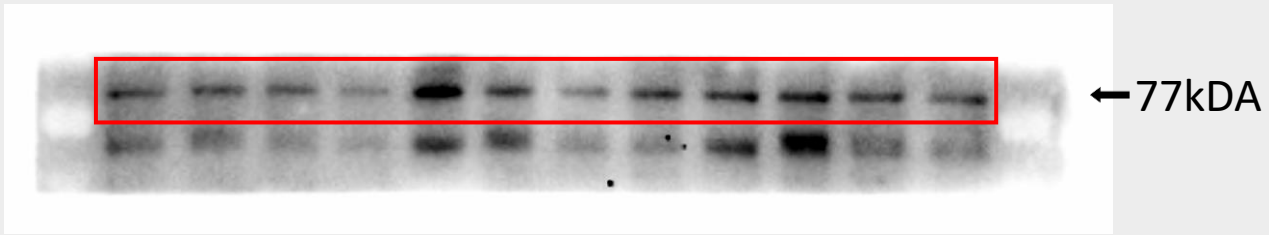

pSHIP1

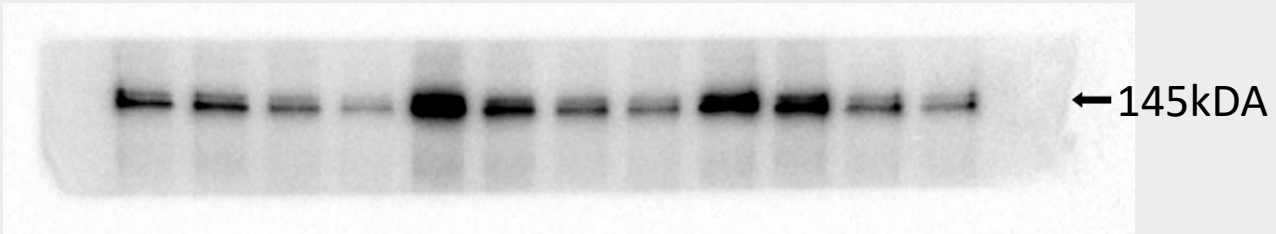

pS6

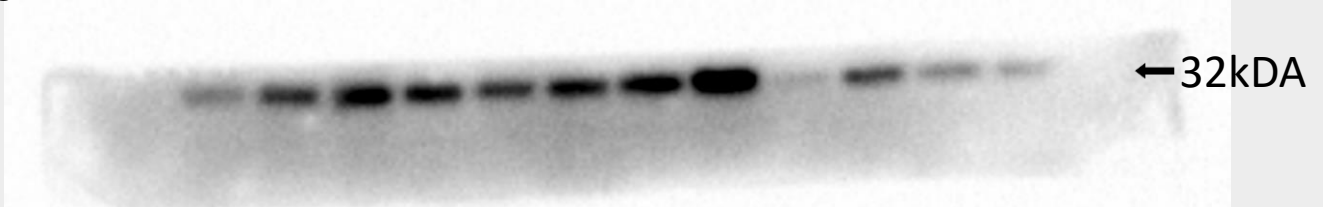

$\beta$ -actin

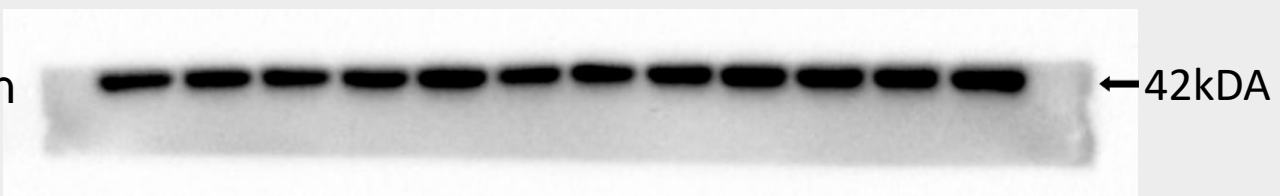

Fig3H

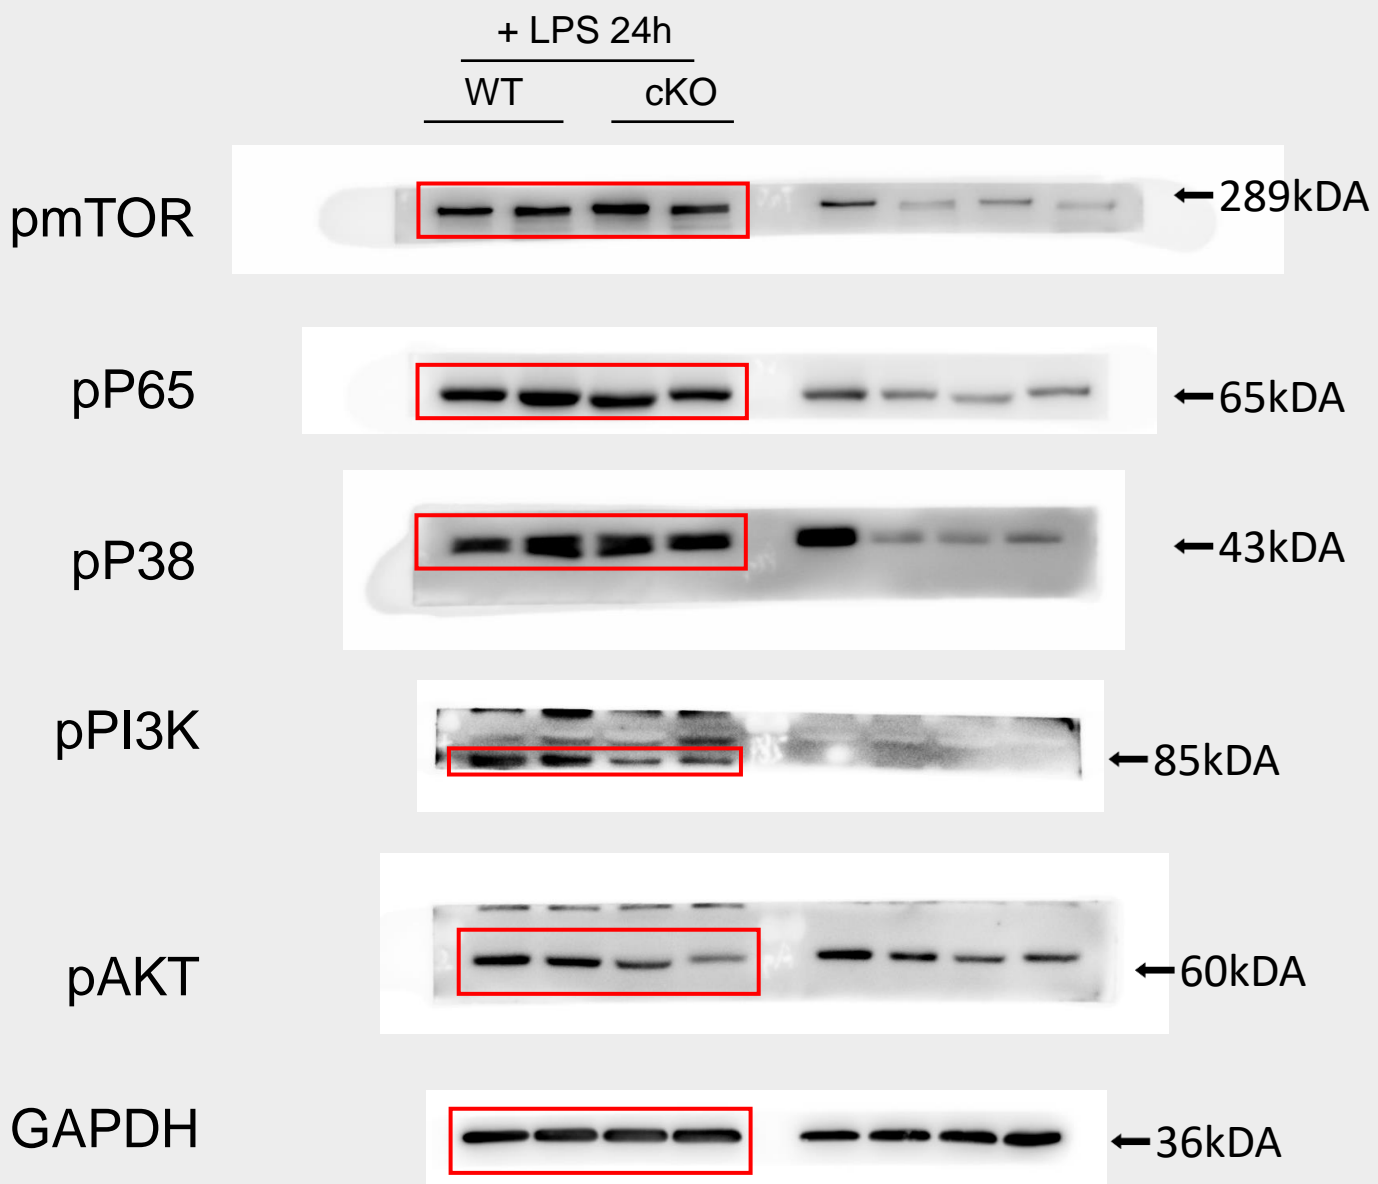

Fig3K-1

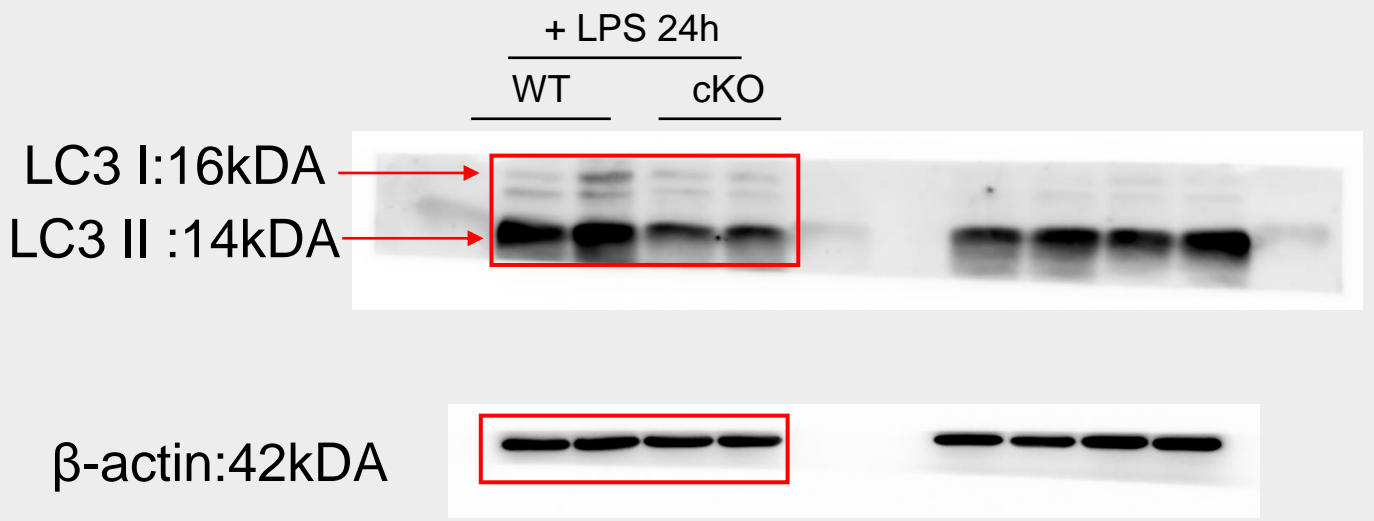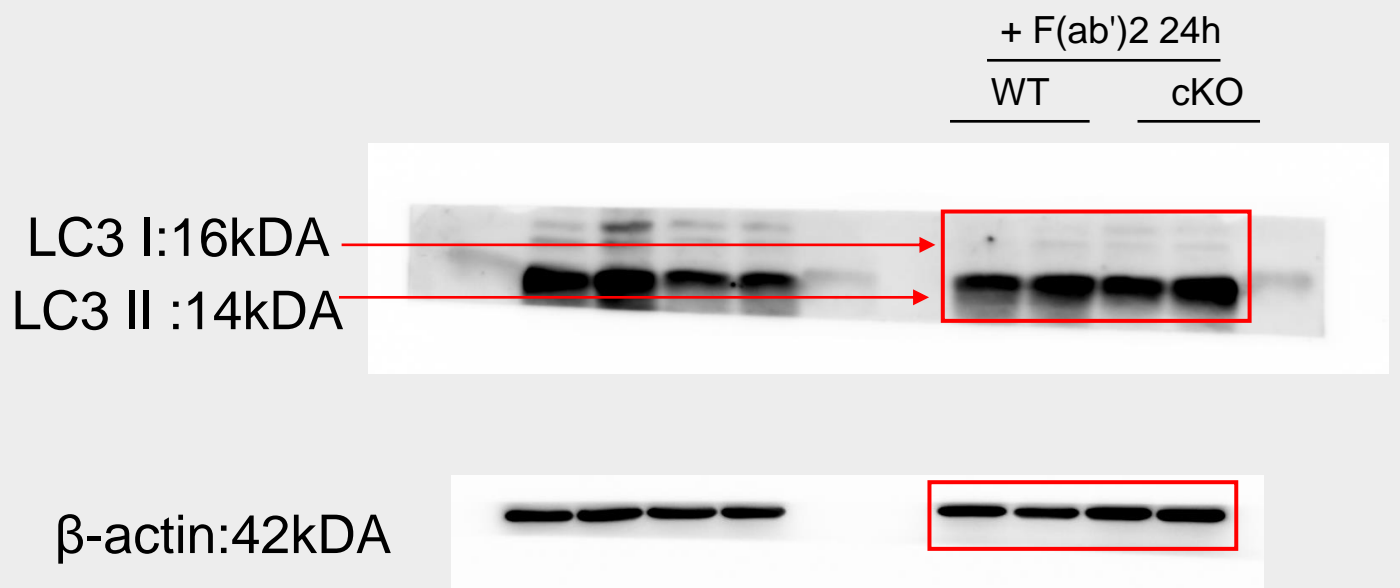

Fig3K-2

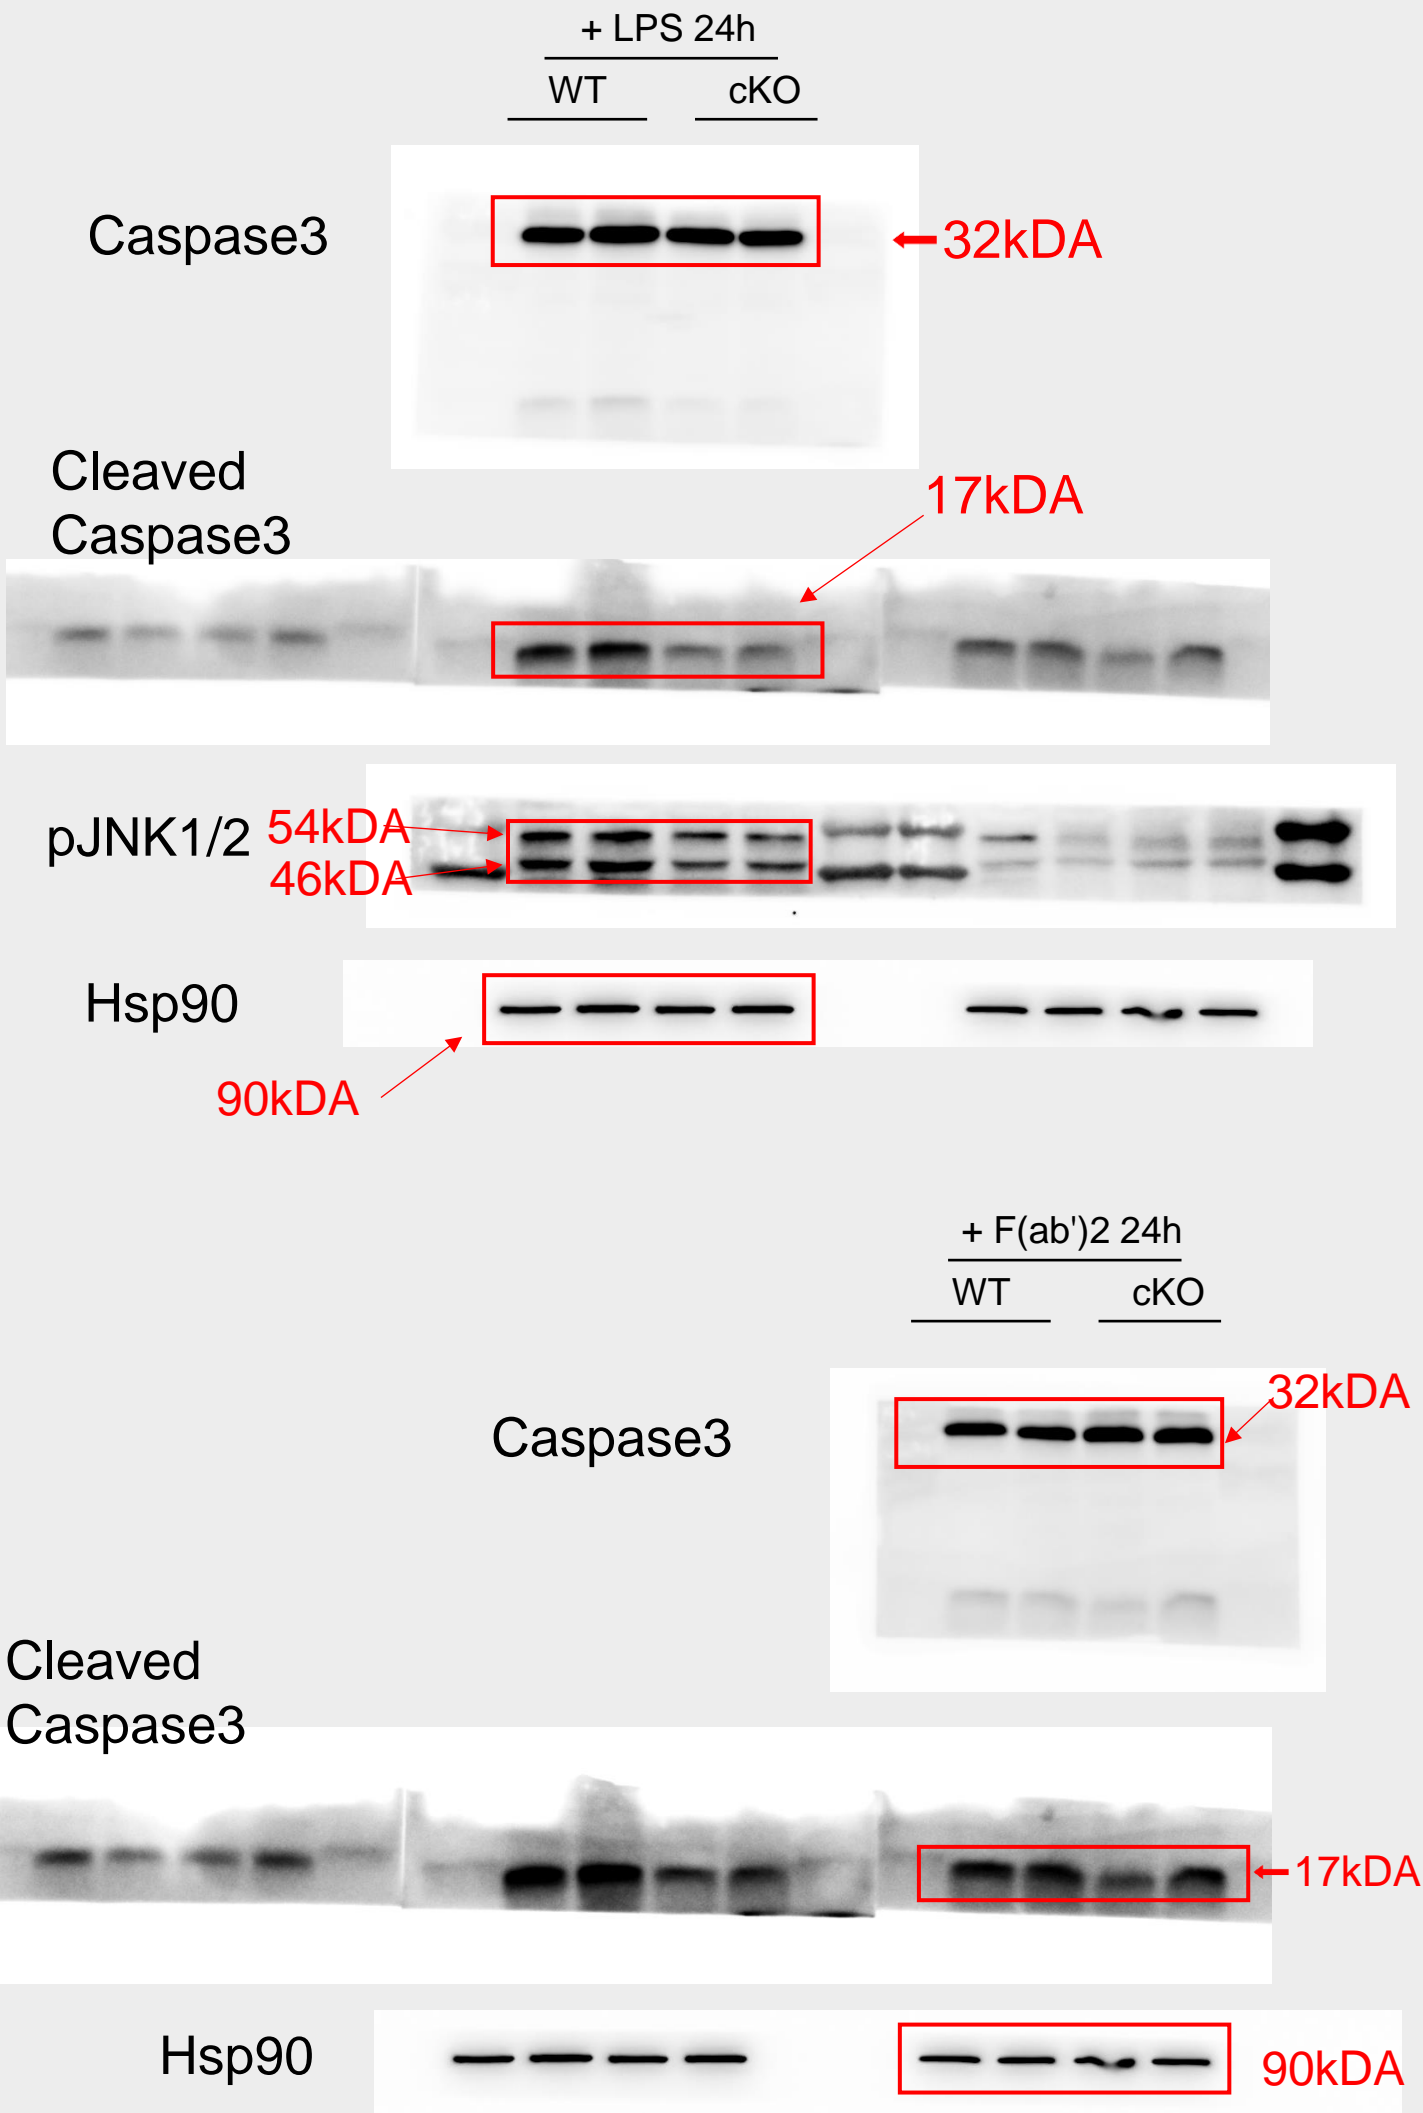

Fig4-M

(min) WT cKO  
0 5 10 30 0 5 10 30

pIKK $\alpha/\beta$

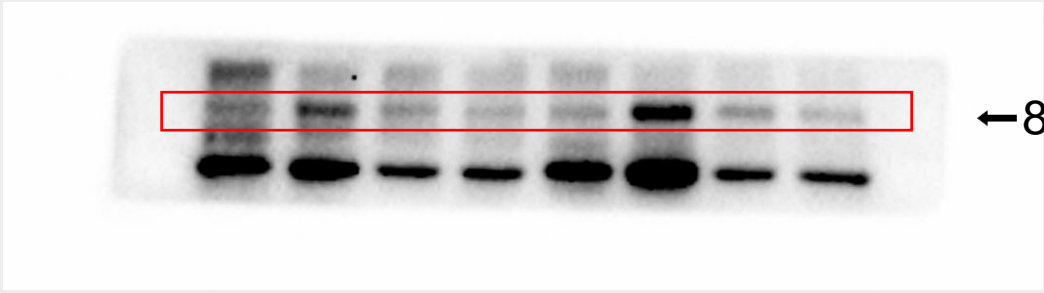

←87kDA

IKK $\alpha/\beta$

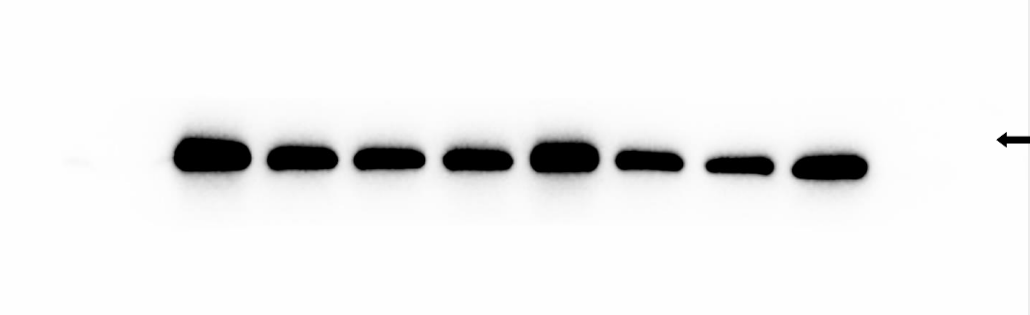

←87kDA

pP65

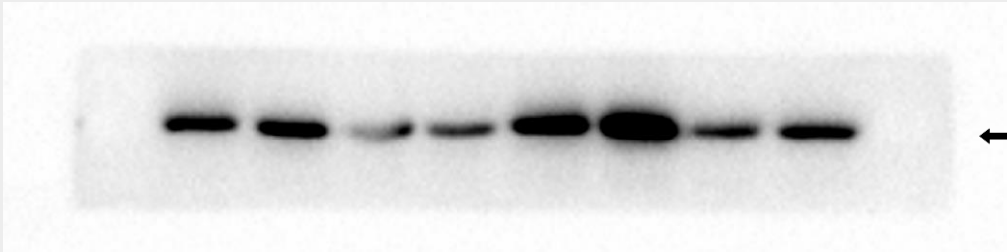

←65kDA

P65

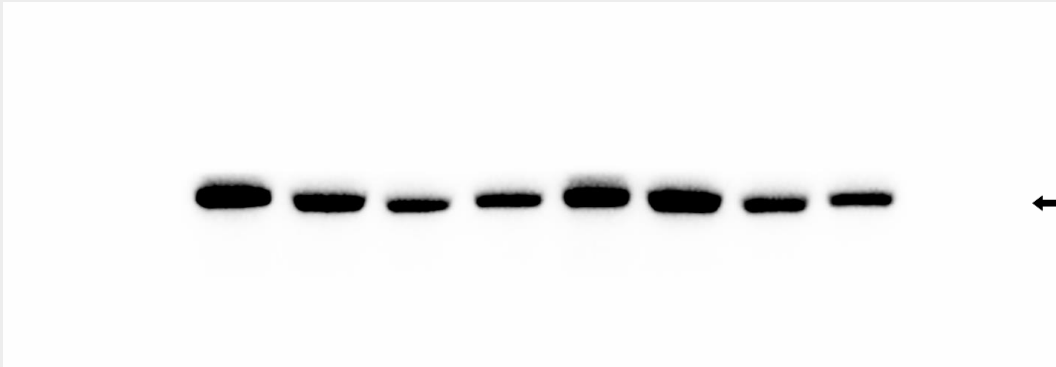

←65kDA

Fig4-N

(min) WT cKO  
0 5 10 30 0 5 10 30

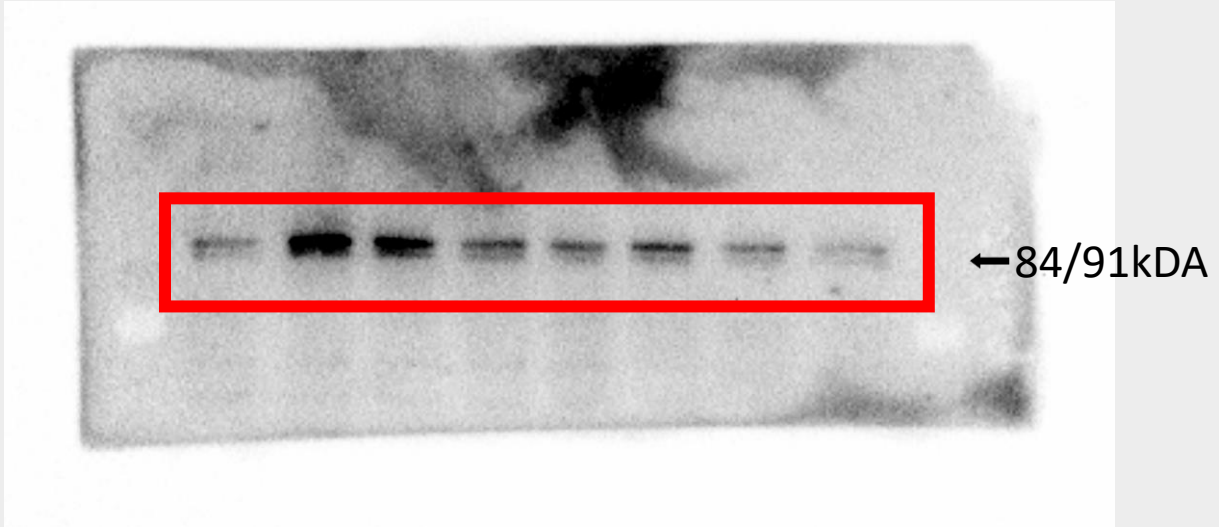

STAT1

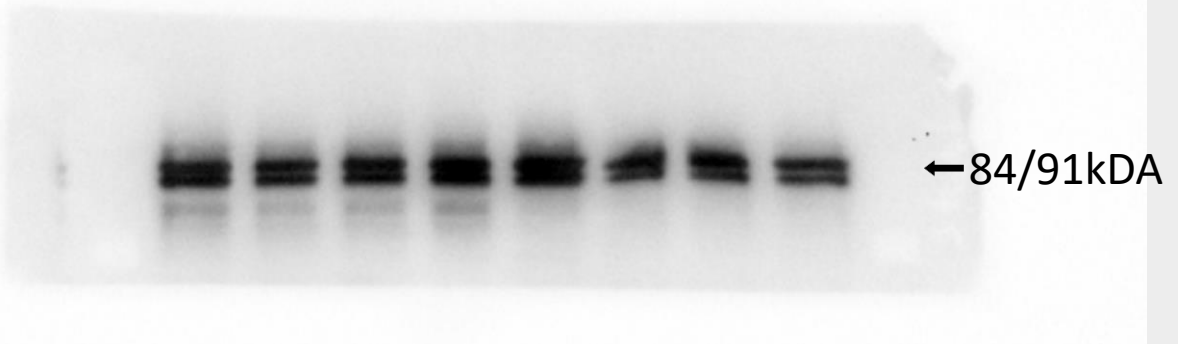

pSTAT5

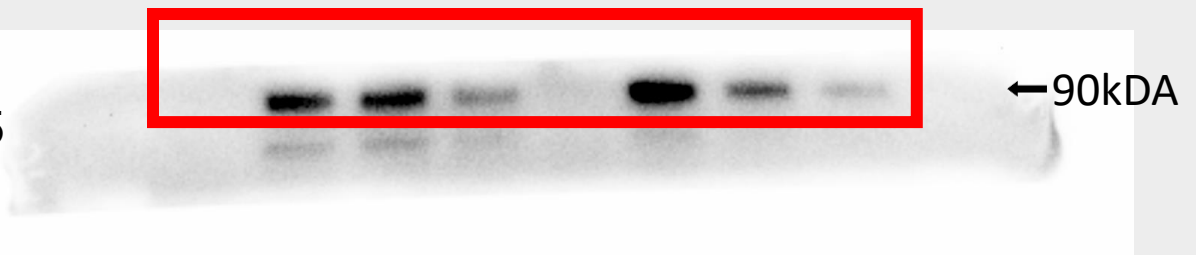

STAT5

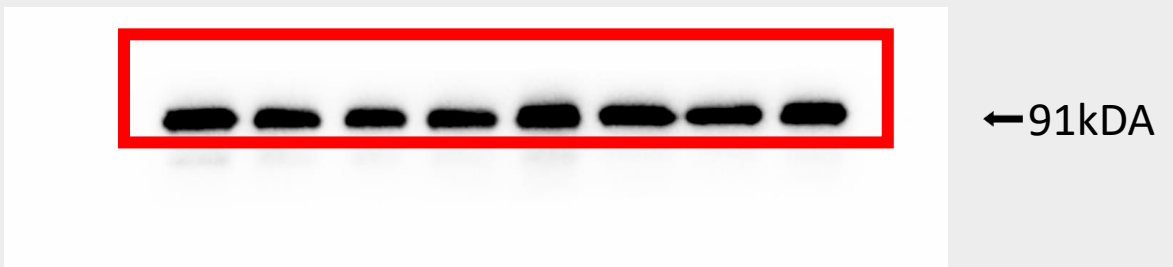

Fig5E

(min)      WT                      cKO  
                 0    5    10    30      0    5    10    30

pWASP

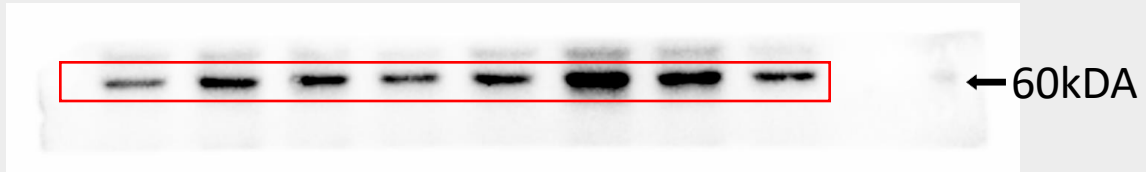

WASP

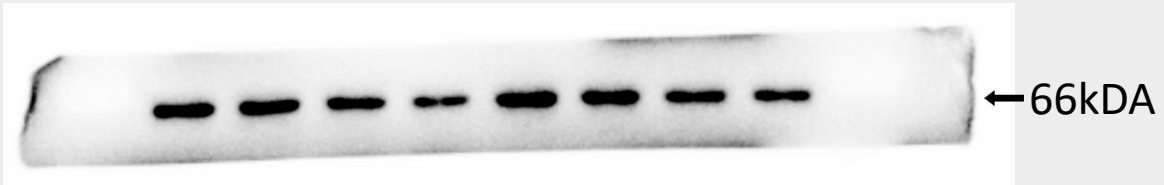

pEzrin

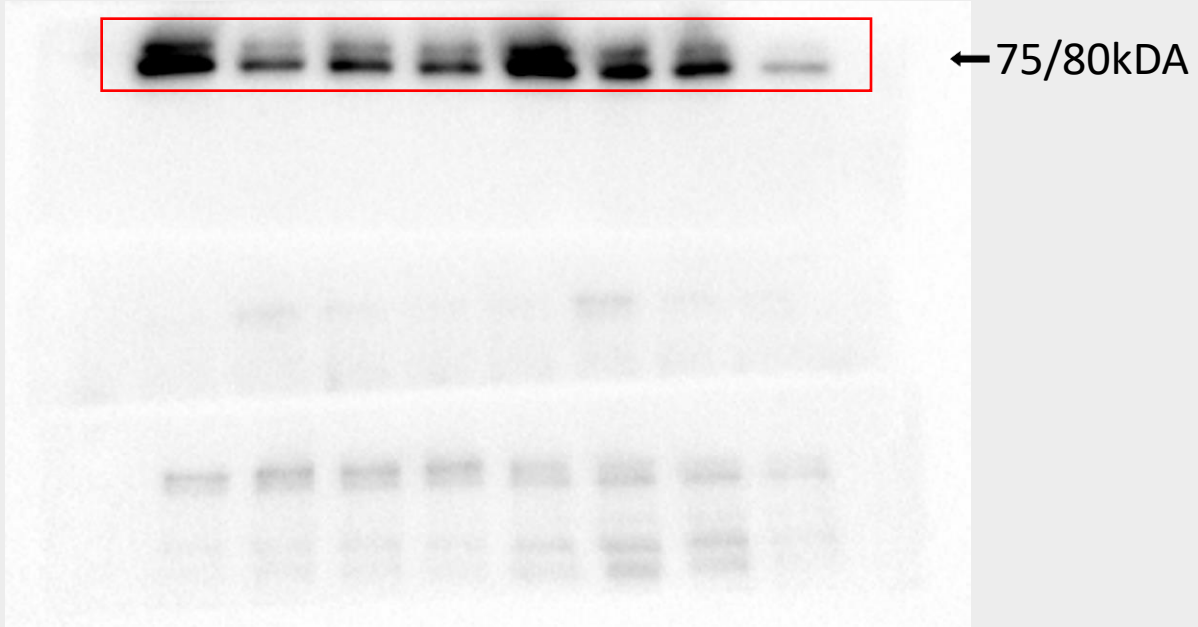

$\beta$ -actin

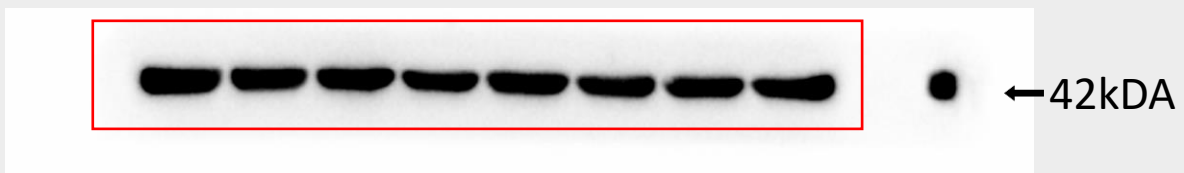

Fig5F

(min) WT cKO  
0 5 10 30 0 5 10 30

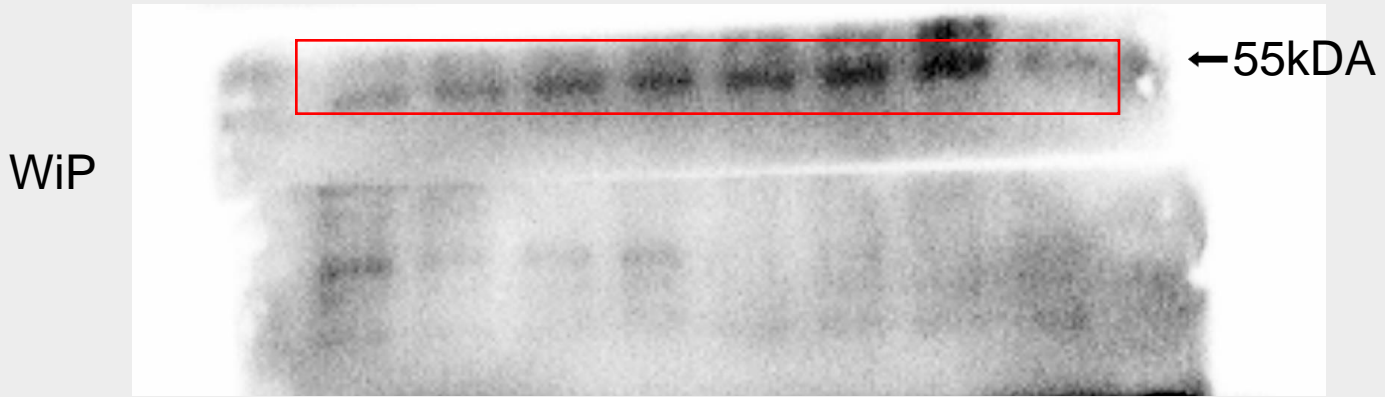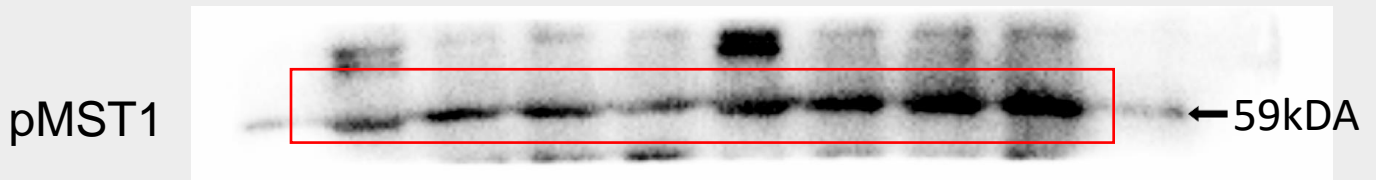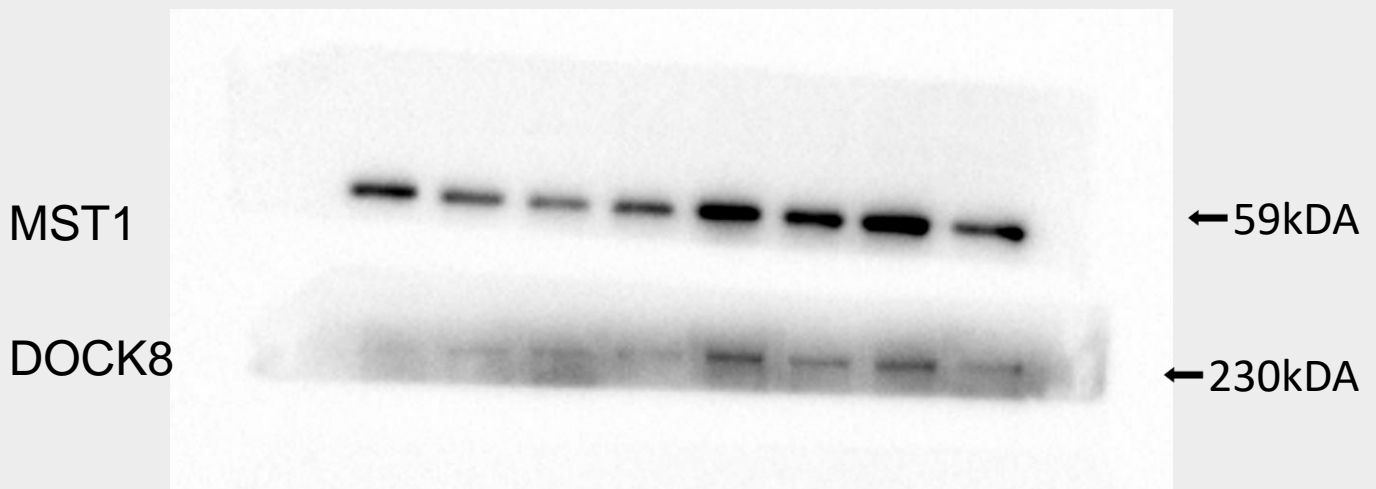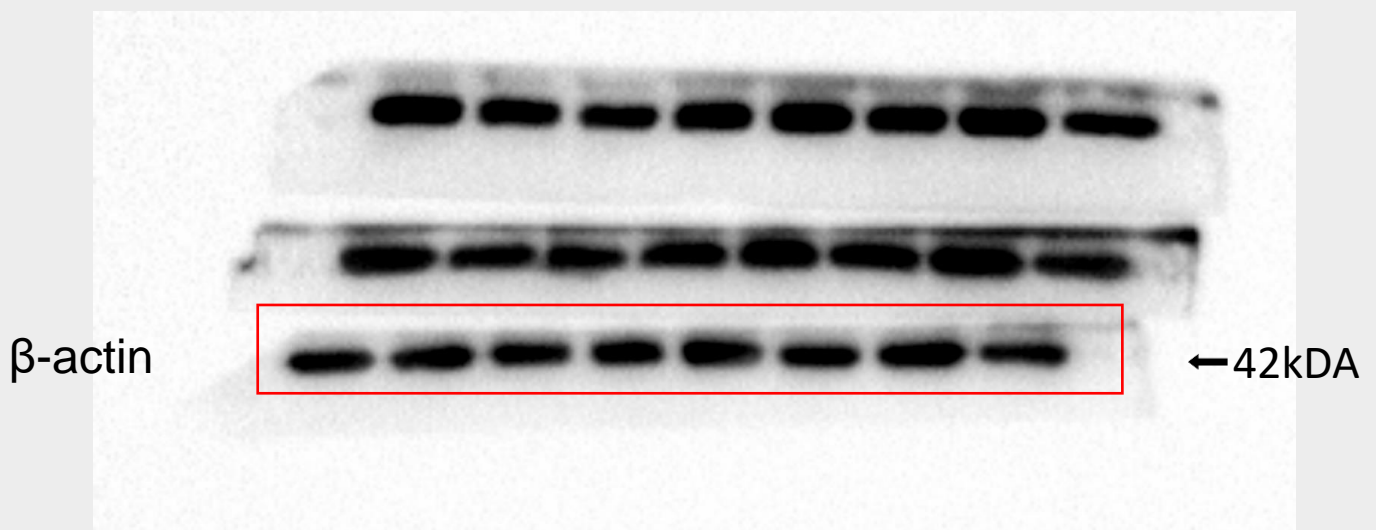

Fig5G

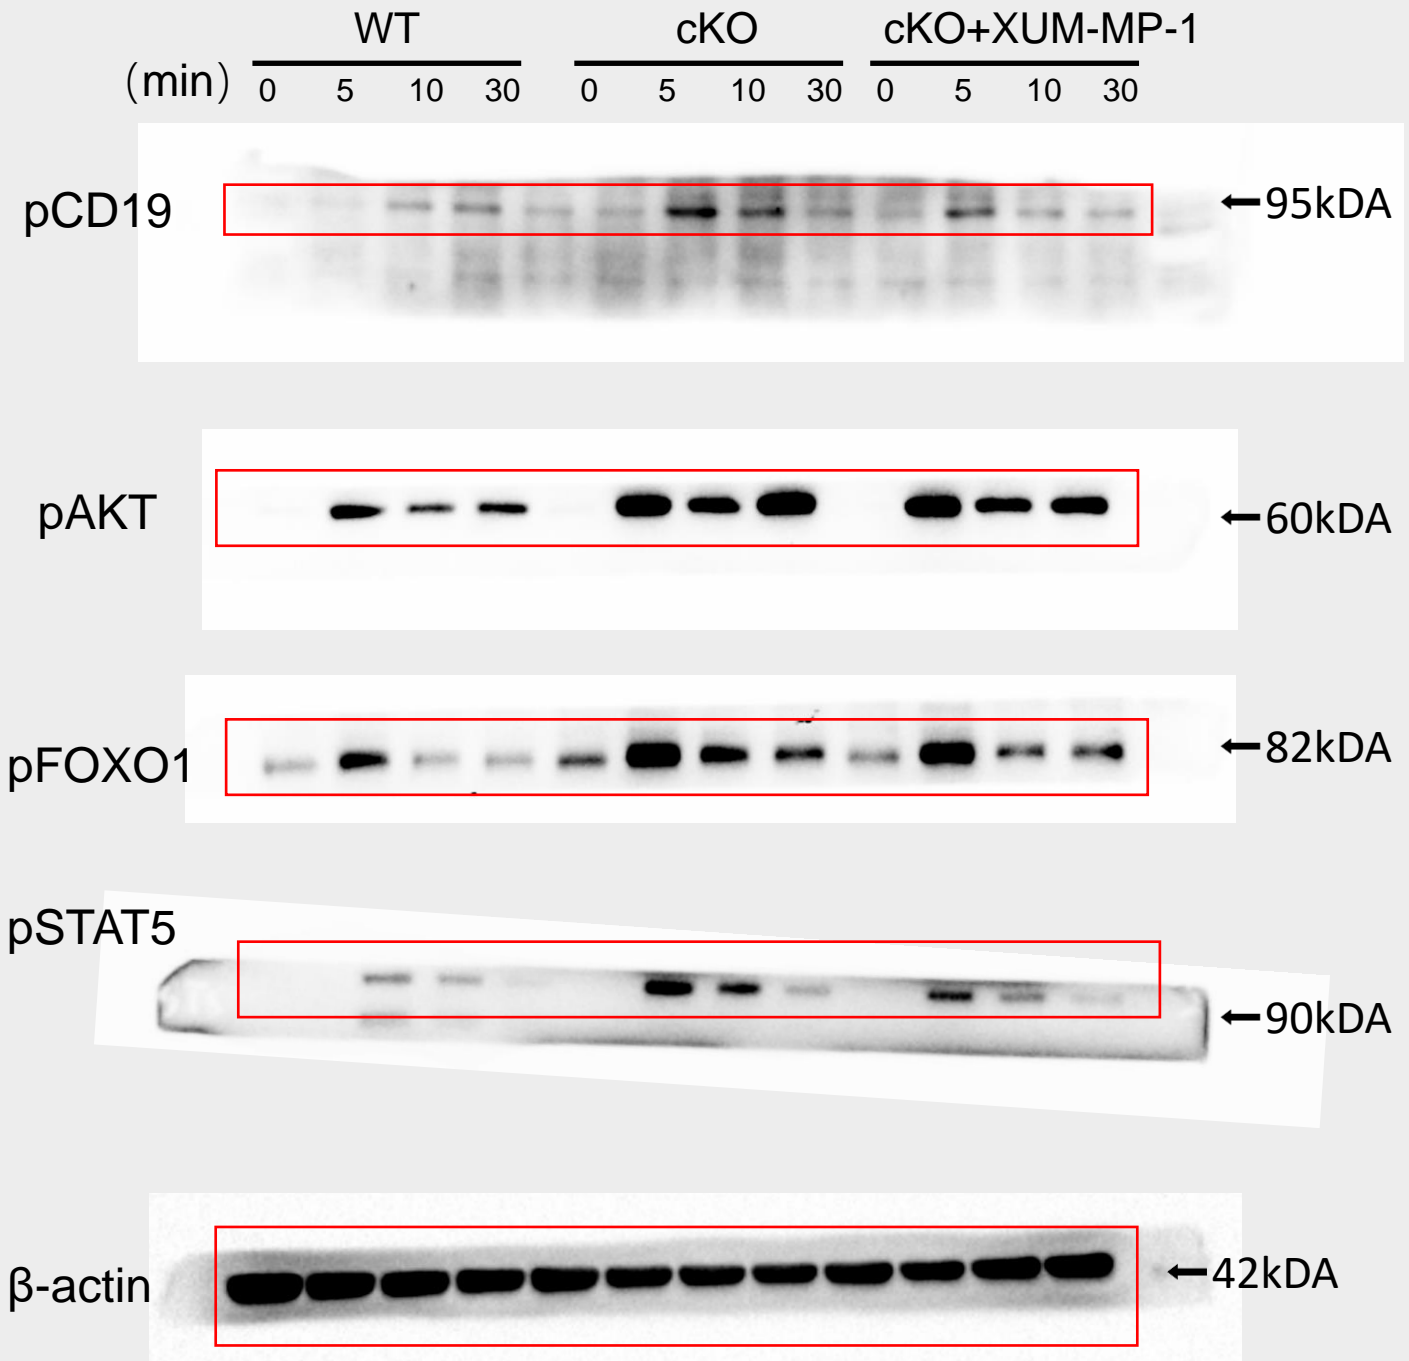

Fig8-K

LEF1

WT cKO

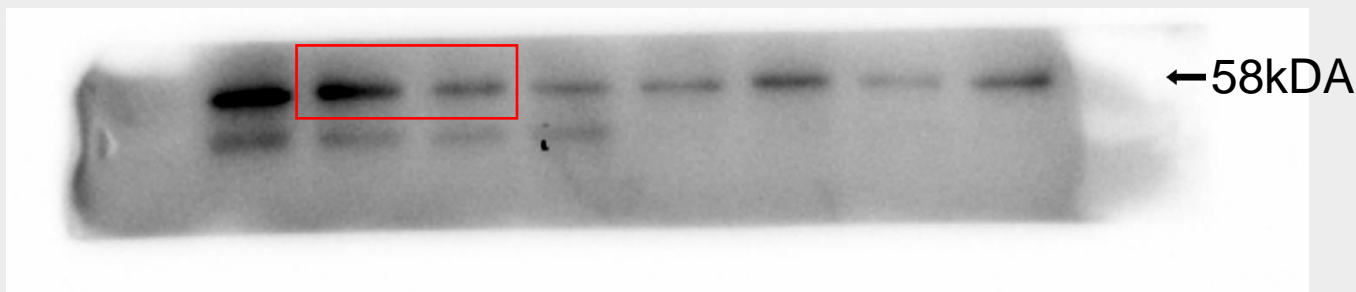

β-actin

WT cKO

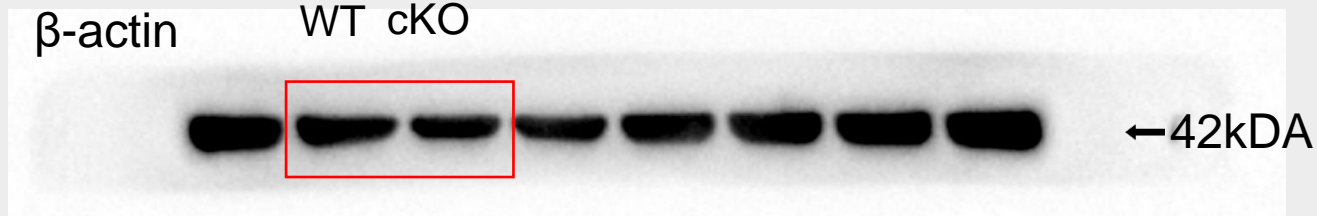

Marker WT cKO Marker

c-MYC

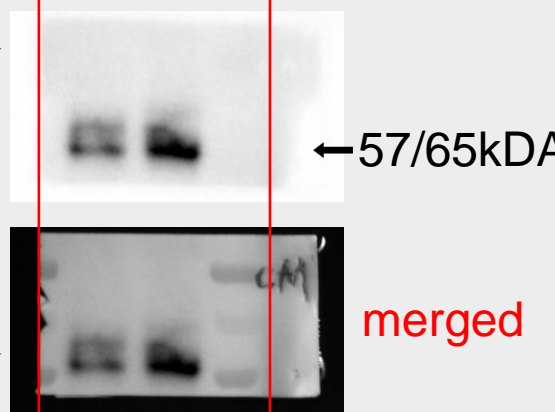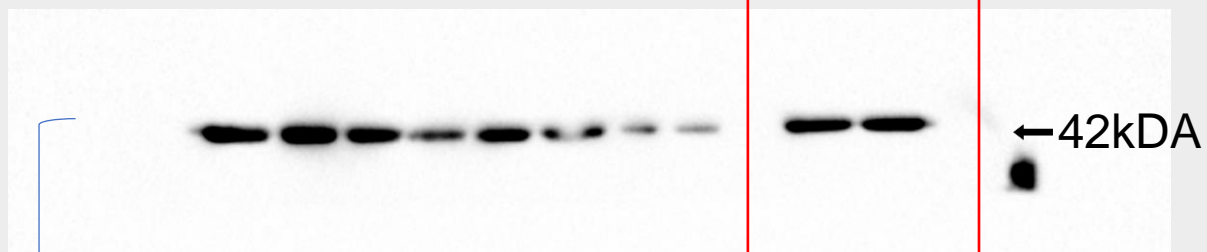

β-actin

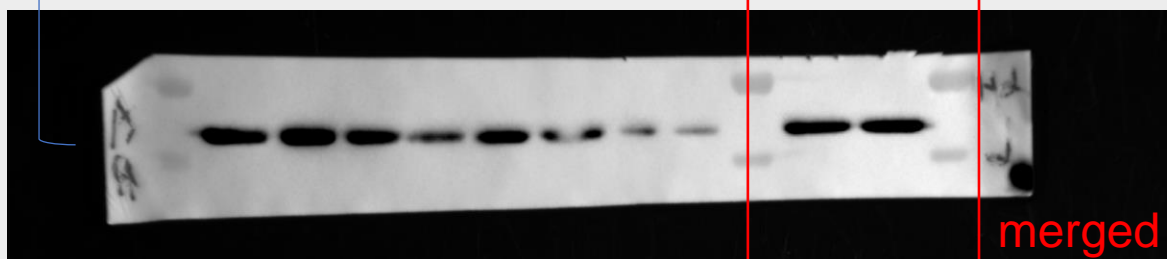

Marker WT cKO Marker

Fig8-M

marker  
In put  
IgG+digested chromatin  
Anti-Histone H3+digested chromatin  
marker  
In put  
IgG+digested chromatin  
Anti-HMGB1+digested chromatin

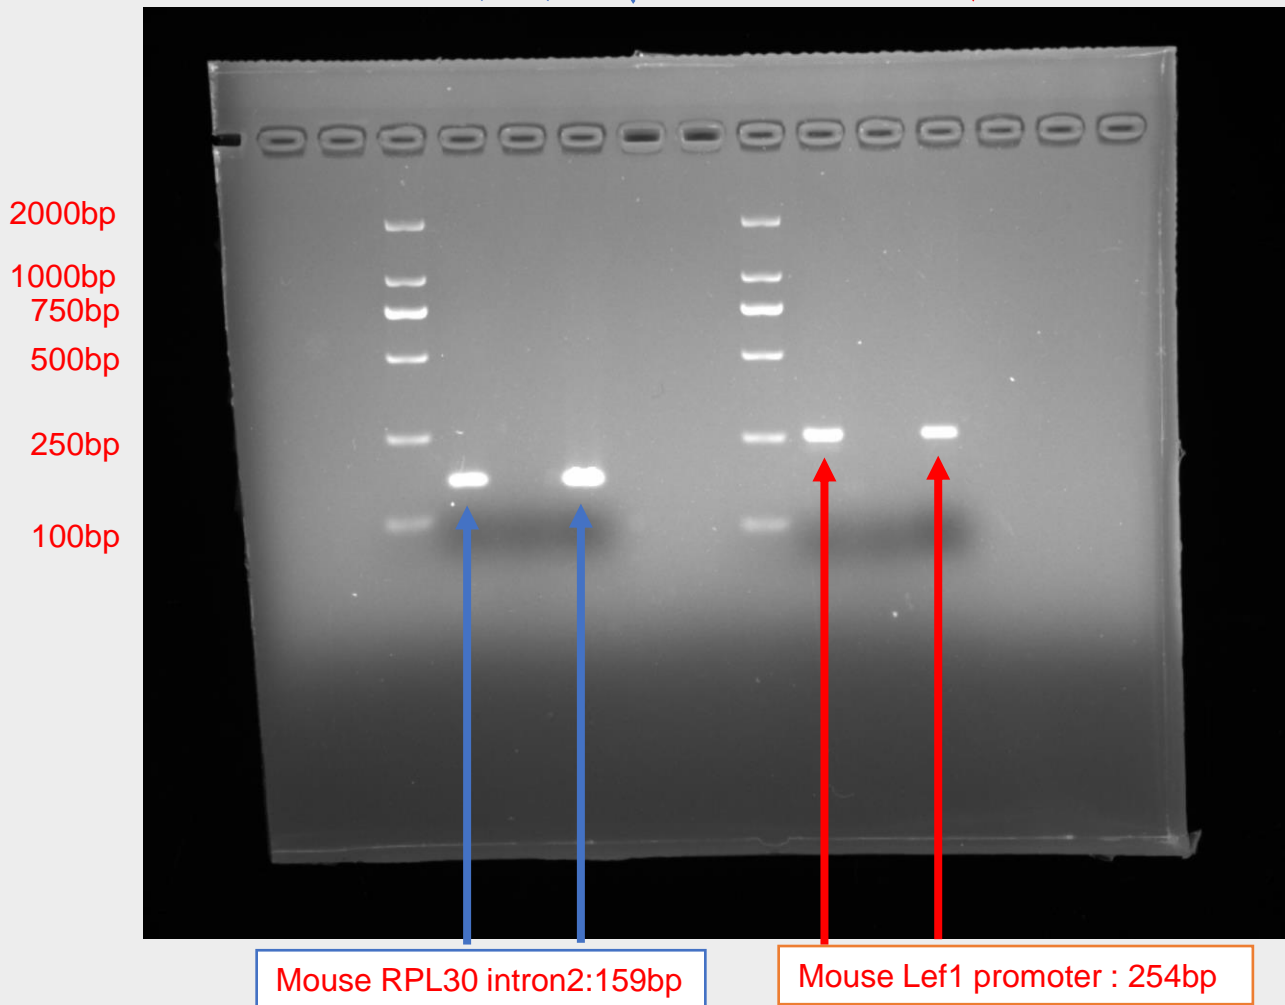

Fig S1B

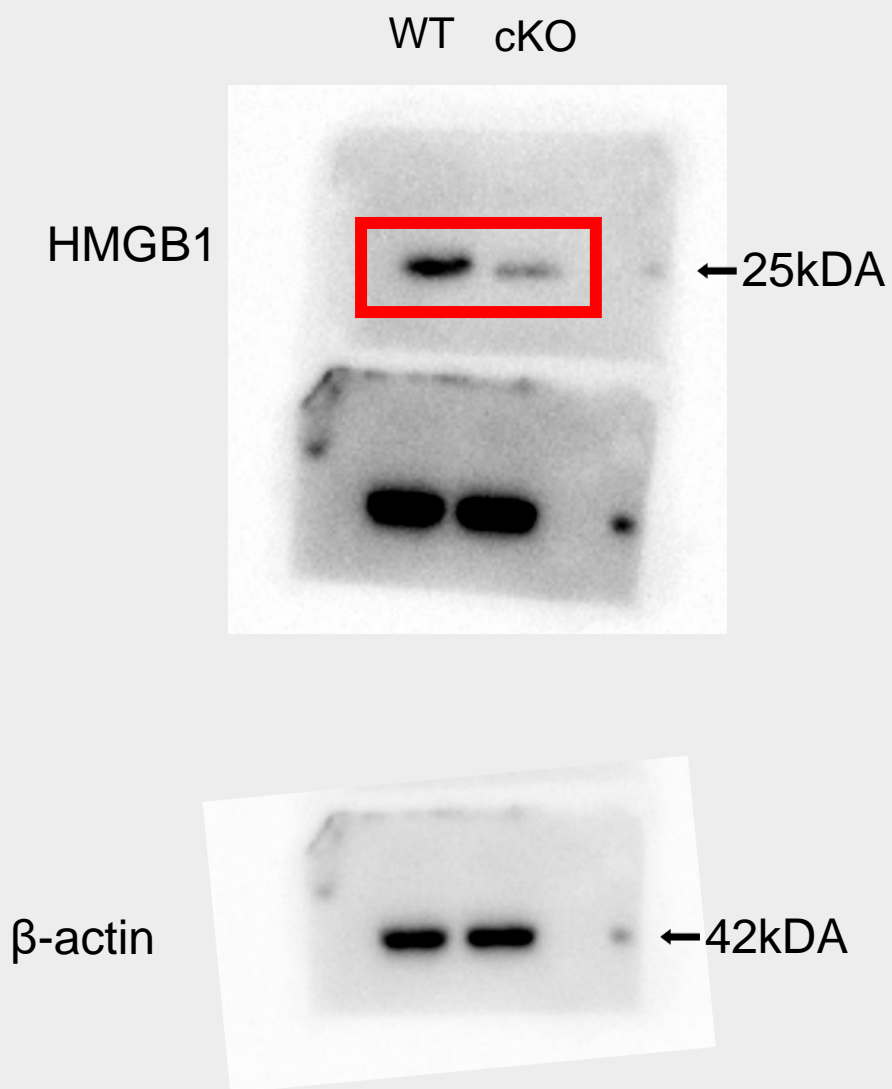

Fig S1-D1

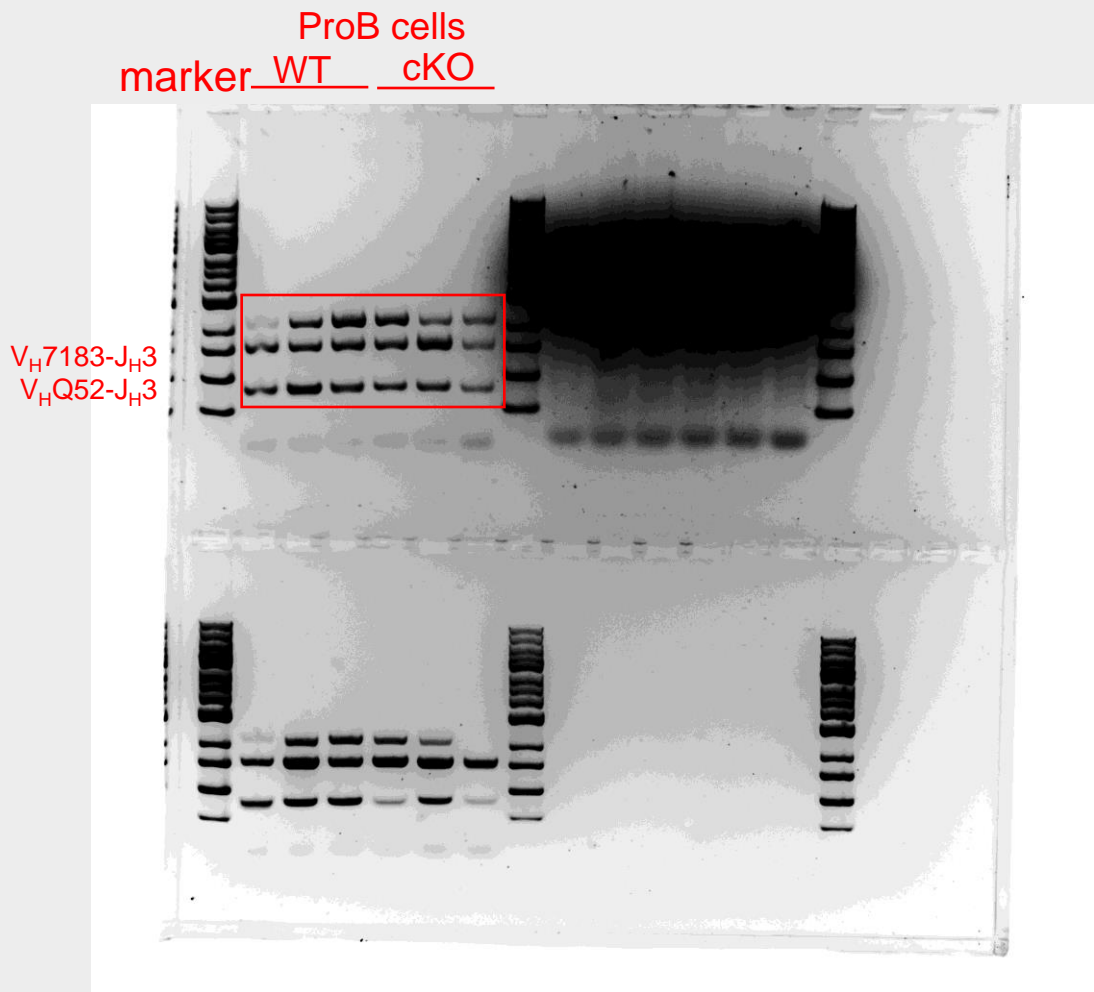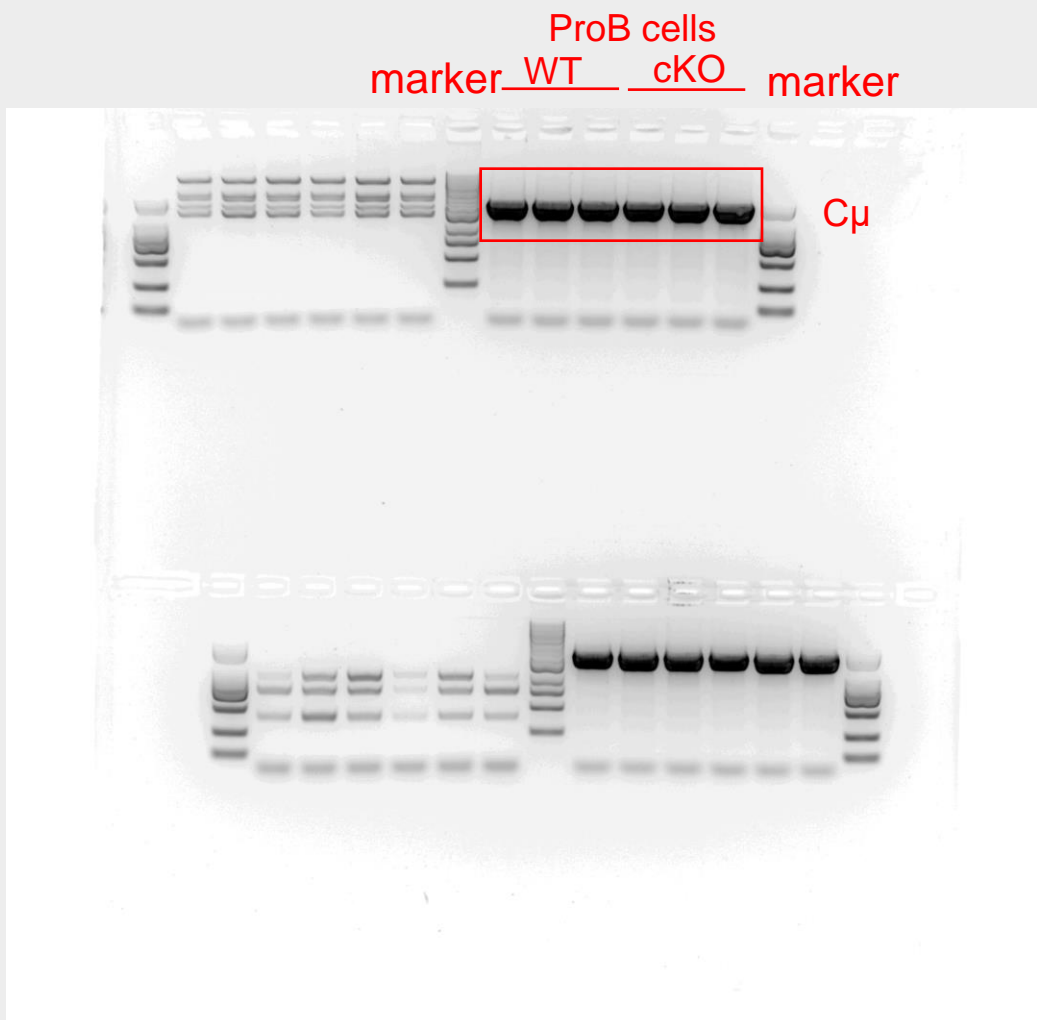

Fig S1-D2

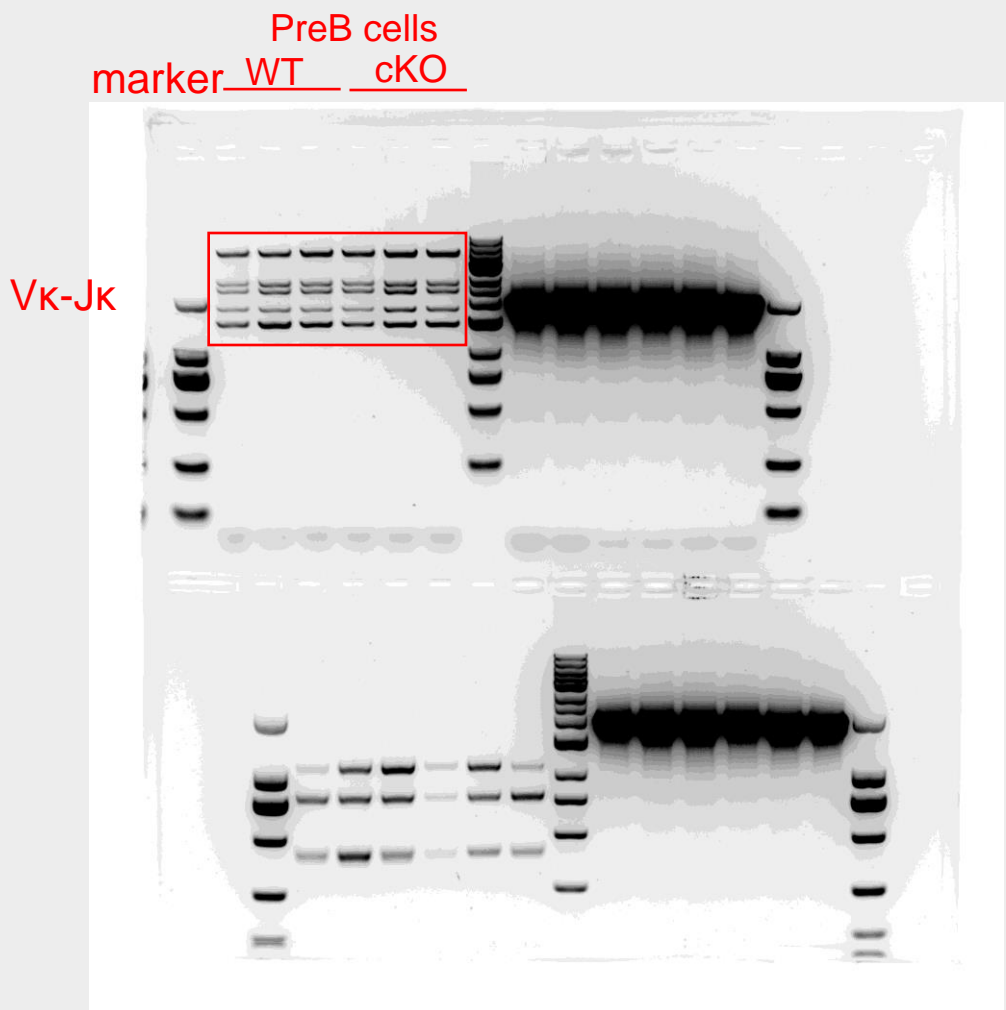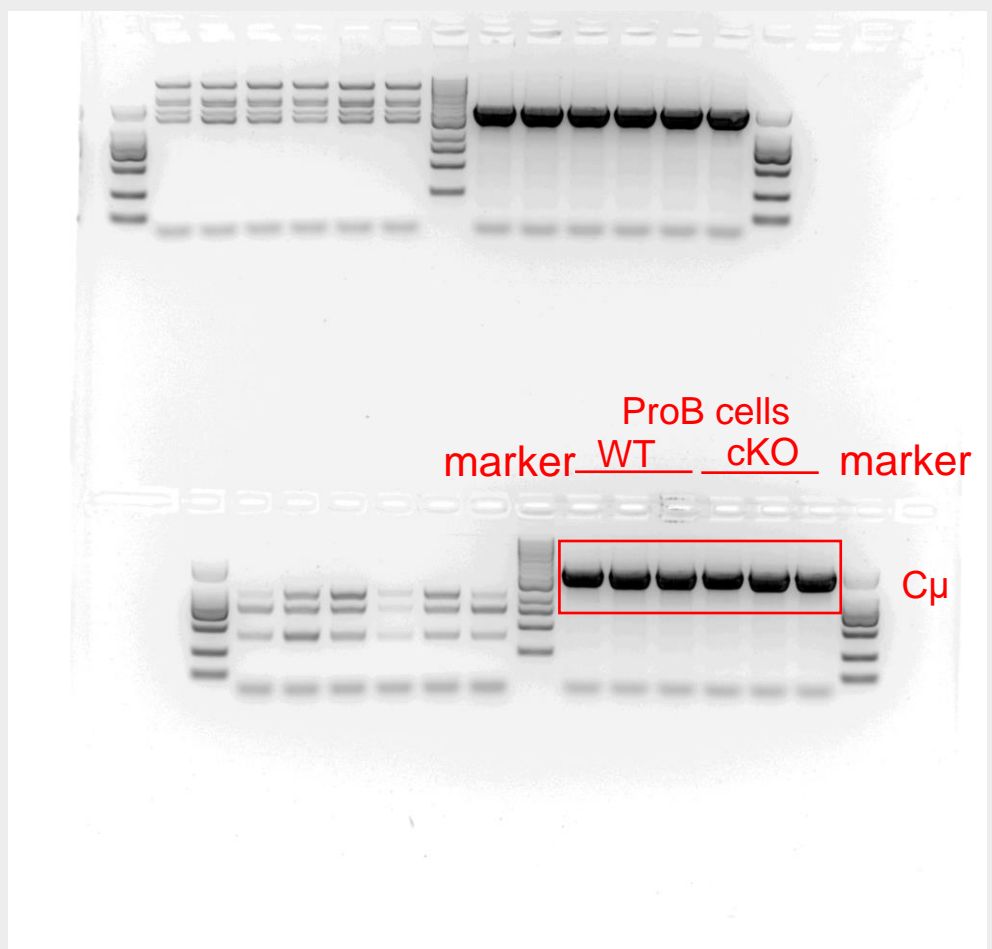

Fig S4-K

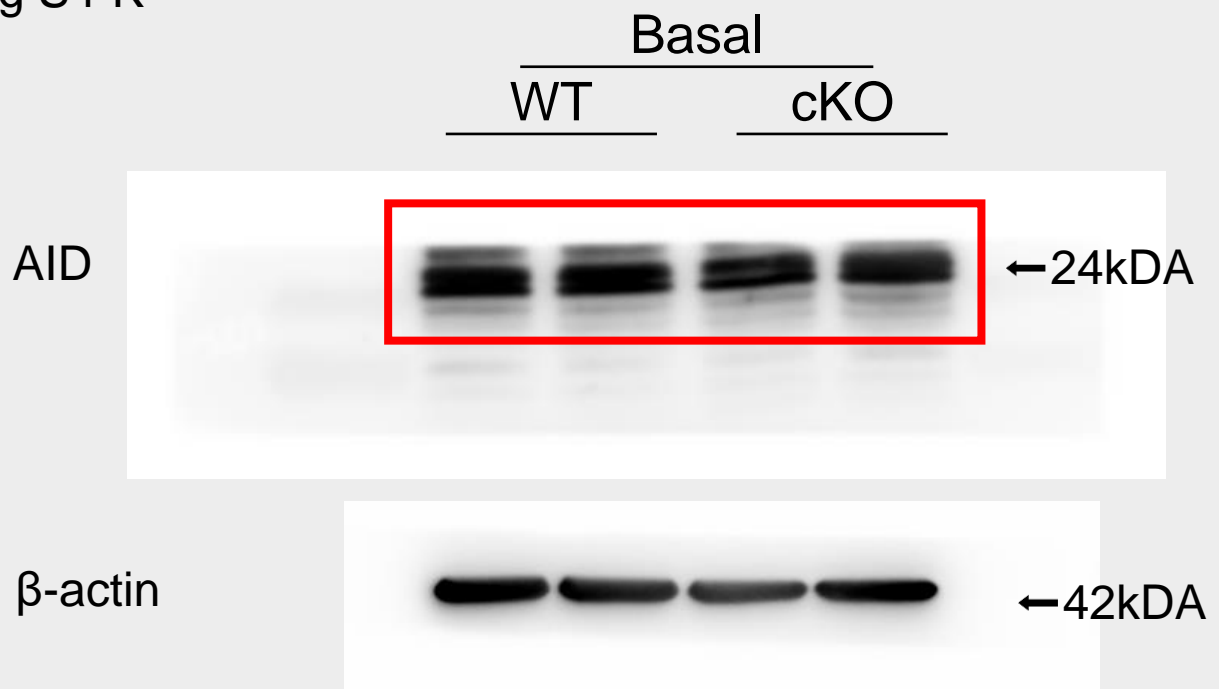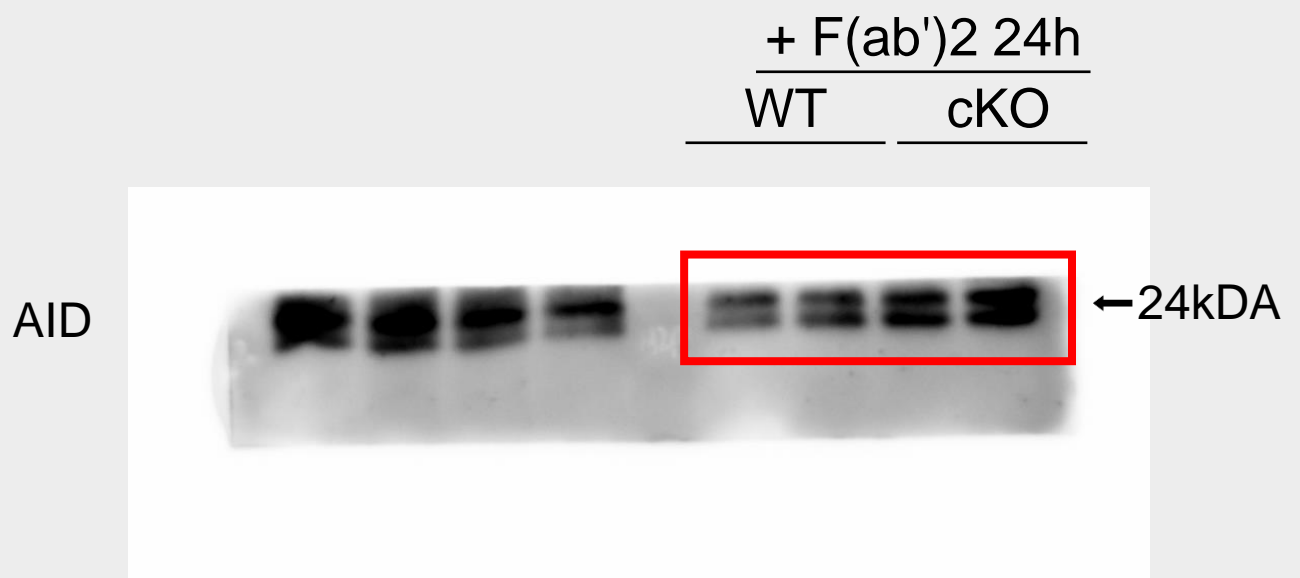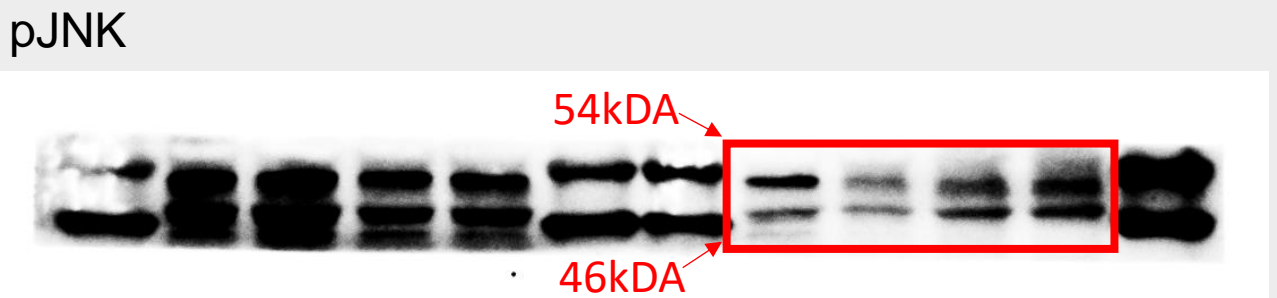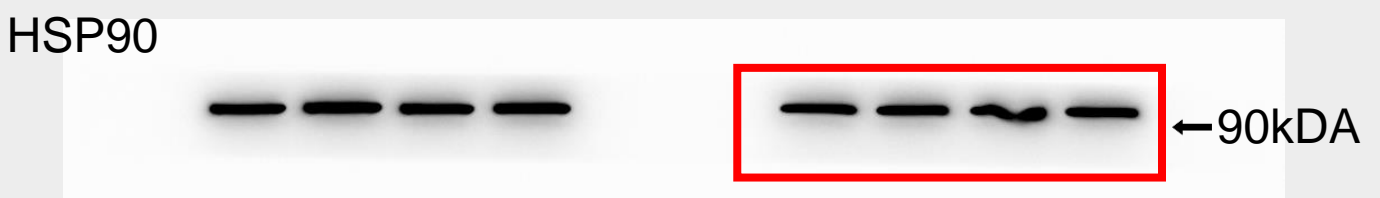

Supplement: sd2 [file 2]
